# Supplementary material for: Energetic derivatives of 4,4′,5,5′-tetranitro-2H,2′H-3,3′-bipyrazole (TNBP): synthesis, characterization and promising properties
Source: Royal Society of Chemistry journal article supplement (doi:10.1039/c7ta11172j), 2018-01-01
Supplement: c7ta11172j1.pdf [file c7ta11172j1.pdf]

## Electronic Supplementary Information

### **Energetic derivatives of 4,4',5,5'-tetranitro-2*H*,2'*H*-3,3'-bipyrazole (TNBP): synthesis, characterization and promising properties**

Yongxing Tang,<sup>[a]</sup> Chunlin He,<sup>[a]</sup> Gregory H. Imler,<sup>[b]</sup> Damon A. Parrish<sup>[b]</sup> and

Jean'ne M. Shreeve\*<sup>[a]</sup>

[a] Dr. Y. Tang, Dr. C. He, Prof. Dr. J. M. Shreeve

Department of Chemistry

University of Idaho

Moscow, Idaho, 83844-2343 USA.

Fax: (+1) 208-885-9146

E-mail: [jshreeve@uidaho.edu](mailto:jshreeve@uidaho.edu)

[b] Dr. G. H. Imler, Dr. D. A. Parrish

Naval Research Laboratory

4555 Overlook Avenue

Washington, D.C. 20375 USA

## Table of Contents

|                           | Page |
|---------------------------|------|
| 1 Crystal Structure Data  | S3   |
| 2 Theoretical Calculation | S8   |
| 3 NMR Spectra             | S9   |

## 1 Crystal Structure Data

**Table S1.** Crystal data and structure refinement for **3**.

| Identification code               | <b>3</b>                                                                                                                          |
|-----------------------------------|-----------------------------------------------------------------------------------------------------------------------------------|
| CCDC number                       | 1811781                                                                                                                           |
| Empirical formula                 | C <sub>7</sub> HN <sub>11</sub> O <sub>14</sub>                                                                                   |
| Formula weight                    | 463.19                                                                                                                            |
| Temperature                       | 293(2) K                                                                                                                          |
| Wavelength                        | 1.54178 Å                                                                                                                         |
| Crystal system                    | Monoclinic                                                                                                                        |
| Space group                       | C2/c                                                                                                                              |
| Unit cell dimensions              | $a = 17.130(3)$ Å, $\alpha = 90^\circ$<br>$b = 6.8390(11)$ Å, $\beta = 93.850(6)^\circ$<br>$c = 27.832(5)$ Å, $\gamma = 90^\circ$ |
| Volume                            | 3253.1(9) Å <sup>3</sup>                                                                                                          |
| Z                                 | 8                                                                                                                                 |
| Density (20°C)                    | 1.891 Mg/m <sup>3</sup>                                                                                                           |
| Absorption coefficient            | 1.670 mm <sup>-1</sup>                                                                                                            |
| F(000)                            | 1856                                                                                                                              |
| Crystal size                      | 0.247 × 0.086 × 0.020 mm <sup>3</sup>                                                                                             |
| Theta range for data collection   | 3.183 to 68.233°.                                                                                                                 |
| Index ranges                      | -16 ≤ h ≤ 20, -7 ≤ k ≤ 8, -28 ≤ l ≤ 33                                                                                            |
| Reflections collected             | 8864                                                                                                                              |
| Independent reflections           | 2818 [R <sub>int</sub> = 0.0325]                                                                                                  |
| Completeness to theta = 67.679°   | 94.8 %                                                                                                                            |
| Absorption correction             | Semi-empirical from equivalents                                                                                                   |
| Max. and min. transmission        | 0.7538 and 0.6057                                                                                                                 |
| Refinement method                 | Full-matrix least-squares on F <sup>2</sup>                                                                                       |
| Data / restraints / parameters    | 2818 / 6 / 309                                                                                                                    |
| Goodness-of-fit on F <sup>2</sup> | 1.045                                                                                                                             |
| Final R indices [I > 2σ(I)]       | R <sub>1</sub> = 0.0514, wR <sub>2</sub> = 0.1283                                                                                 |
| R indices (all data)              | R <sub>1</sub> = 0.0590, wR <sub>2</sub> = 0.1321                                                                                 |
| Extinction coefficient            | 0.0070(3)                                                                                                                         |
| Largest diff. peak and hole       | 0.318 and -0.345 e.Å <sup>-3</sup>                                                                                                |

**Table S2.** Crystal data and structure refinement for **5**

| Identification code               | <b>5</b>                                                                                                                                                                                 |
|-----------------------------------|------------------------------------------------------------------------------------------------------------------------------------------------------------------------------------------|
| CCDC number                       | 1811782                                                                                                                                                                                  |
| Empirical formula                 | C <sub>6</sub> H <sub>3</sub> KN <sub>8</sub> O <sub>9</sub>                                                                                                                             |
| Formula weight                    | 370.26                                                                                                                                                                                   |
| Temperature                       | 293(2) K                                                                                                                                                                                 |
| Wavelength                        | 0.71073 Å                                                                                                                                                                                |
| Crystal system                    | Triclinic                                                                                                                                                                                |
| Space group                       | P-1                                                                                                                                                                                      |
| Unit cell dimensions              | $a = 7.3543(3) \text{ \AA}$ , $\alpha = 105.6180(10)^\circ$<br>$b = 9.0468(3) \text{ \AA}$ , $\beta = 94.5290(10)^\circ$<br>$c = 10.7236(4) \text{ \AA}$ , $\gamma = 108.8990(10)^\circ$ |
| Volume                            | 639.18(4) Å <sup>3</sup>                                                                                                                                                                 |
| Z                                 | 2                                                                                                                                                                                        |
| Density (20°C)                    | 1.924 Mg/m <sup>3</sup>                                                                                                                                                                  |
| Absorption coefficient            | 0.491 mm <sup>-1</sup>                                                                                                                                                                   |
| F(000)                            | 372                                                                                                                                                                                      |
| Crystal size                      | 0.231 × 0.198 × 0.080 mm <sup>3</sup>                                                                                                                                                    |
| Theta range for data collection   | 3.273 to 30.000°.                                                                                                                                                                        |
| Index ranges                      | -10 ≤ h ≤ 9, -12 ≤ k ≤ 12, -14 ≤ l ≤ 15                                                                                                                                                  |
| Reflections collected             | 9186                                                                                                                                                                                     |
| Independent reflections           | 3519 [R <sub>int</sub> = 0.0183]                                                                                                                                                         |
| Completeness to theta = 25.242°   | 99.0 %                                                                                                                                                                                   |
| Absorption correction             | Semi-empirical from equivalents                                                                                                                                                          |
| Max. and min. transmission        | 0.7460 and 0.6963                                                                                                                                                                        |
| Refinement method                 | Full-matrix least-squares on F <sup>2</sup>                                                                                                                                              |
| Data / restraints / parameters    | 3519 / 3 / 223                                                                                                                                                                           |
| Goodness-of-fit on F <sup>2</sup> | 1.044                                                                                                                                                                                    |
| Final R indices [I > 2σ(I)]       | R <sub>1</sub> = 0.0338, wR <sub>2</sub> = 0.0814                                                                                                                                        |
| R indices (all data)              | R <sub>1</sub> = 0.0454, wR <sub>2</sub> = 0.0885                                                                                                                                        |
| Largest diff. peak and hole       | 0.307 and -0.270 e.Å <sup>-3</sup>                                                                                                                                                       |

**Table S3.** Crystal data and structure refinement for **8**.

| Identification code               | <b>8</b>                                                                                                                          |
|-----------------------------------|-----------------------------------------------------------------------------------------------------------------------------------|
| CCDC number                       | 1811783                                                                                                                           |
| Empirical formula                 | C <sub>6</sub> H <sub>12</sub> N <sub>12</sub> O <sub>9</sub>                                                                     |
| Formula weight                    | 396.28                                                                                                                            |
| Temperature                       | 293(2) K                                                                                                                          |
| Wavelength                        | 0.71073 Å                                                                                                                         |
| Crystal system                    | Monoclinic                                                                                                                        |
| Space group                       | C2/c                                                                                                                              |
| Unit cell dimensions              | $a = 24.534(7)$ Å, $\alpha = 90^\circ$<br>$b = 3.7499(9)$ Å, $\beta = 122.434(6)^\circ$<br>$c = 18.811(5)$ Å, $\gamma = 90^\circ$ |
| Volume                            | 1460.7(7) Å <sup>3</sup>                                                                                                          |
| Z                                 | 4                                                                                                                                 |
| Density (20°C)                    | 1.802 Mg/m <sup>3</sup>                                                                                                           |
| Absorption coefficient            | 0.165 mm <sup>-1</sup>                                                                                                            |
| F(000)                            | 816                                                                                                                               |
| Crystal size                      | 0.062 × 0.023 × 0.020 mm <sup>3</sup>                                                                                             |
| Theta range for data collection   | 3.936 to 28.314°.                                                                                                                 |
| Index ranges                      | -32 ≤ h ≤ 32, -4 ≤ k ≤ 4, -25 ≤ l ≤ 20                                                                                            |
| Reflections collected             | 6763                                                                                                                              |
| Independent reflections           | 1784 [R <sub>int</sub> = 0.0764]                                                                                                  |
| Completeness to theta = 25.242°   | 99.2 %                                                                                                                            |
| Absorption correction             | Semi-empirical from equivalents                                                                                                   |
| Max. and min. transmission        | 0.7457 and 0.4858                                                                                                                 |
| Refinement method                 | Full-matrix least-squares on F <sup>2</sup>                                                                                       |
| Data / restraints / parameters    | 1784 / 38 / 183                                                                                                                   |
| Goodness-of-fit on F <sup>2</sup> | 1.023                                                                                                                             |
| Final R indices [I > 2σ(I)]       | R <sub>1</sub> = 0.0665, wR <sub>2</sub> = 0.1527                                                                                 |
| R indices (all data)              | R <sub>1</sub> = 0.1332, wR <sub>2</sub> = 0.1835                                                                                 |
| Largest diff. peak and hole       | 0.393 and -0.350 e.Å <sup>-3</sup>                                                                                                |

**Table S4.** Crystal data and structure refinement for **10**.

| Identification code               | <b>10</b>                                                                                                                            |
|-----------------------------------|--------------------------------------------------------------------------------------------------------------------------------------|
| CCDC number                       | 1811784                                                                                                                              |
| Empirical formula                 | C <sub>8</sub> H <sub>14</sub> N <sub>16</sub> O <sub>8</sub>                                                                        |
| Formula weight                    | 462.35                                                                                                                               |
| Temperature                       | 293(2) K                                                                                                                             |
| Wavelength                        | 0.71073 Å                                                                                                                            |
| Crystal system                    | Monoclinic                                                                                                                           |
| Space group                       | P2/n                                                                                                                                 |
| Unit cell dimensions              | $a = 6.7723(10)$ Å, $\alpha = 90^\circ$<br>$b = 10.2479(15)$ Å, $\beta = 103.860(5)^\circ$<br>$c = 13.471(2)$ Å, $\gamma = 90^\circ$ |
| Volume                            | 907.7(2) Å <sup>3</sup>                                                                                                              |
| Z                                 | 2                                                                                                                                    |
| Density (20°C)                    | 1.692 Mg/m <sup>3</sup>                                                                                                              |
| Absorption coefficient            | 0.149 mm <sup>-1</sup>                                                                                                               |
| F(000)                            | 476                                                                                                                                  |
| Crystal size                      | 0.198 × 0.185 × 0.030 mm <sup>3</sup>                                                                                                |
| Theta range for data collection   | 3.115 to 30.010°.                                                                                                                    |
| Index ranges                      | -8 ≤ h ≤ 9, -14 ≤ k ≤ 14, -18 ≤ l ≤ 18                                                                                               |
| Reflections collected             | 10605                                                                                                                                |
| Independent reflections           | 2582 [R <sub>int</sub> = 0.0322]                                                                                                     |
| Completeness to theta = 25.242°   | 99.9 %                                                                                                                               |
| Absorption correction             | Semi-empirical from equivalents                                                                                                      |
| Max. and min. transmission        | 0.7460 and 0.7035                                                                                                                    |
| Refinement method                 | Full-matrix least-squares on F <sup>2</sup>                                                                                          |
| Data / restraints / parameters    | 2582 / 3 / 151                                                                                                                       |
| Goodness-of-fit on F <sup>2</sup> | 1.021                                                                                                                                |
| Final R indices [I > 2σ(I)]       | R <sub>1</sub> = 0.0413, wR <sub>2</sub> = 0.1110                                                                                    |
| R indices (all data)              | R <sub>1</sub> = 0.0702, wR <sub>2</sub> = 0.1273                                                                                    |
| Largest diff. peak and hole       | 0.273 and -0.250 e.Å <sup>-3</sup>                                                                                                   |

**Table S5.** Hydrogen bonds for **3** [Å and °].

| D-H...A               | d(D-H) | d(H...A) | d(D...A) | <(DHA) |
|-----------------------|--------|----------|----------|--------|
| N(31)-H(31)...O(29)#1 | 0.86   | 2.15     | 2.905(3) | 146.7  |

Symmetry transformations used to generate equivalent atoms:

#1 -x+3/2,y+1/2,-z+1/2

**Table S6.** Hydrogen bonds for **5** [Å and °].

| D-H...A                | d(D-H)    | d(H...A)  | d(D...A)   | <(DHA) |
|------------------------|-----------|-----------|------------|--------|
| N(22)-H(22)...N(10)#1  | 0.86      | 2.04      | 2.8154(16) | 150.2  |
| O(24)-H(24A)...O(20)#2 | 0.811(10) | 2.345(15) | 3.0661(17) | 149(2) |

Symmetry transformations used to generate equivalent atoms:

#1 -x+2,-y+1,-z+1 #2 x+1,y,z+1

**Table S7.** Hydrogen bonds for **8** [Å and °].

| D-H...A                  | d(D-H)    | d(H...A)  | d(D...A) | <(DHA) |
|--------------------------|-----------|-----------|----------|--------|
| N(12)-H(12A)...O(8A)     | 0.89      | 2.16      | 2.794(4) | 127.5  |
| N(12)-H(12A)...N(10A)#1  | 0.89      | 2.19      | 2.928(4) | 139.8  |
| N(12)-H(12B)...O(14)     | 0.89      | 1.95      | 2.802(4) | 158.9  |
| N(13A)-H(13A)...O(7A)#3  | 0.910(10) | 2.25(3)   | 3.007(5) | 140(4) |
| N(12B)-H(12E)...O(7B)#4  | 0.89      | 1.87      | 2.58(5)  | 135.6  |
| N(13B)-H(13C)...N(10B)#2 | 0.908(11) | 2.16(4)   | 3.05(3)  | 163(4) |
| N(13B)-H(13D)...O(1B)#5  | 0.908(10) | 2.18(7)   | 2.93(5)  | 140(6) |
| N(13B)-H(13D)...O(14)    | 0.908(10) | 2.30(5)   | 2.90(2)  | 123(5) |
| O(14)-H(14)...N(11A)#1   | 0.829(10) | 2.034(17) | 2.801(3) | 154(3) |

Symmetry transformations used to generate equivalent atoms:

#1 -x+3/2,-y+1/2,-z+1 #2 -x+3/2,-y+3/2,-z+1  
#3 -x+3/2,y+1/2,-z+1/2 #4 -x+3/2,y-1/2,-z+1/2  
#5 x-1/2,-y+1/2,z-1/2

**Table S8.** Hydrogen bonds for **10** [ $\text{\AA}$  and  $^\circ$ ].

| D-H...A                        | d(D-H)   | d(H...A)  | d(D...A)   | $\angle(\text{DHA})$ |
|--------------------------------|----------|-----------|------------|----------------------|
| N(13)-H(13)...N(9)#1           | 0.86     | 2.19      | 2.9814(17) | 152.9                |
| N(16)-H(16B)...O(7)            | 0.86     | 2.34      | 3.0938(18) | 146.4                |
| N(16)-H(16B)...O(1)            | 0.86     | 2.38      | 3.1019(19) | 141.6                |
| N(15)-H(15B)...O(1)            | 0.86     | 2.17      | 2.9432(18) | 149.3                |
| N(12)-H(12A)...N(10)#20.905(9) |          | 2.387(14) | 3.1795(19) | 146.3(18)            |
| N(12)-H(12B)...O(7)#3          | 0.905(9) | 2.450(18) | 3.1357(19) | 132.8(18)            |

Symmetry transformations used to generate equivalent atoms:

#2  $x, y-1, z$  #5  $-x+1/2, y-1, -z+1/2$ #6  $-x, -y+1, -z+1$ 

## 2 Theoretical Calculation

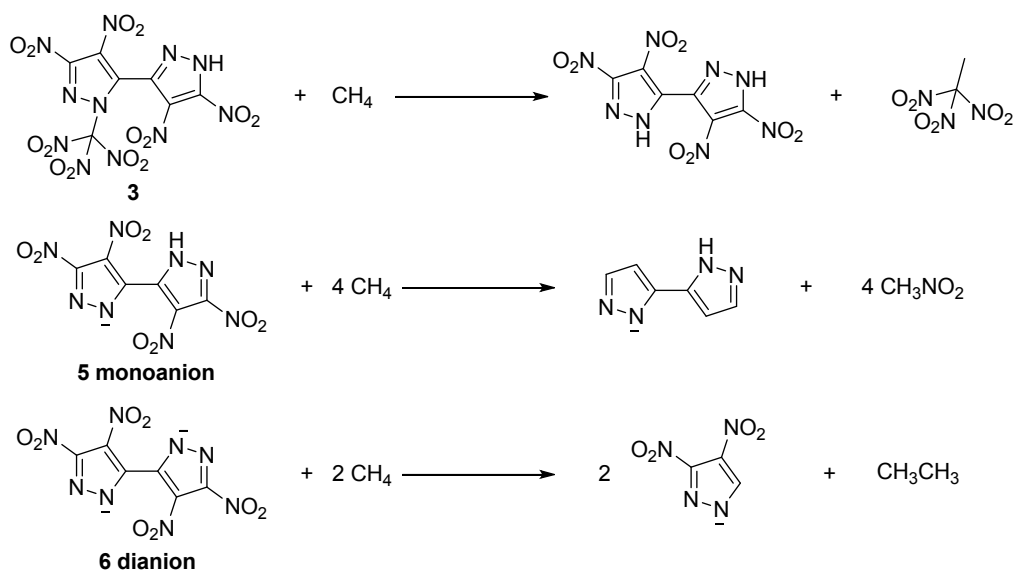**Scheme S1.** Isodesmic reactions



### 3 NMR Spectra

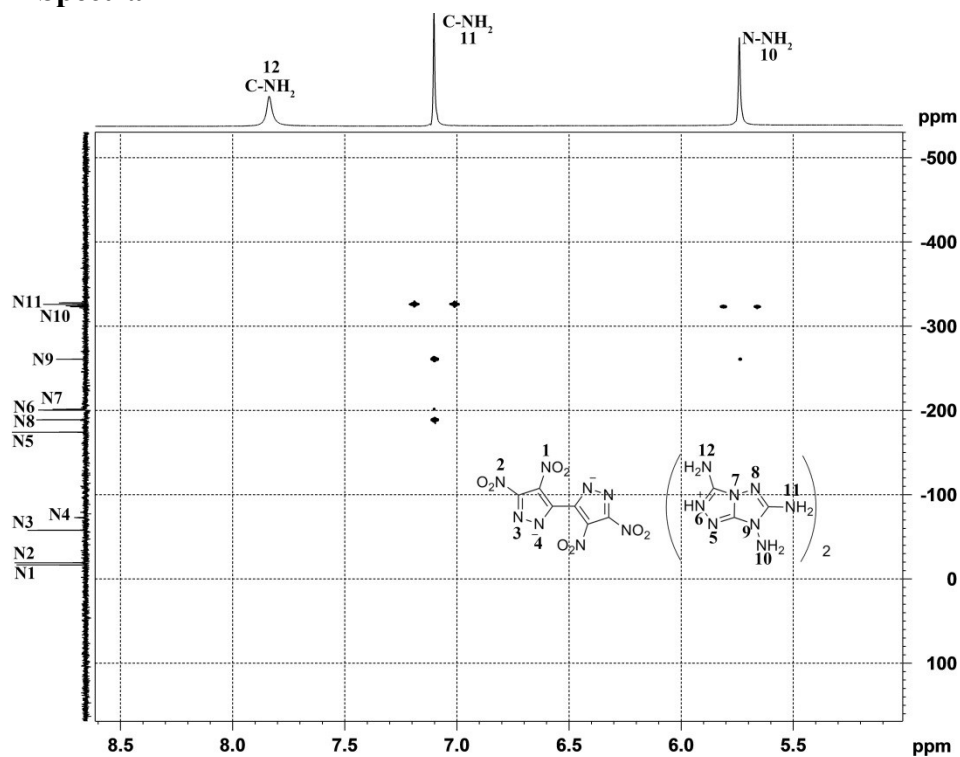

Figure S1.  $^1\text{H}$ - $^{15}\text{N}$  HMBC spectrum of **14**

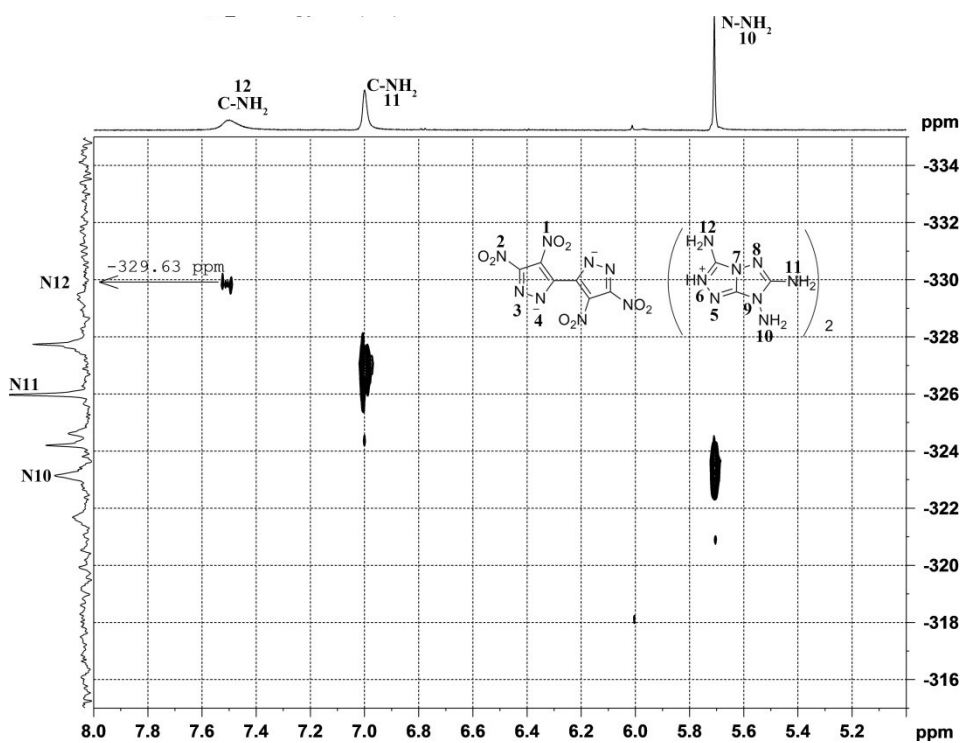

Figure S2.  $^1\text{H}$ - $^{15}\text{N}$  HSQC spectrum of **14**
